# Supplementary material for: Extension of Drosophila lifespan by Korean red ginseng through a mechanism dependent on dSir2 and insulin/IGF-1 signaling
Source: publisher site journal article supplement (doi:10.18632/aging.102387), 2019-10-31
Supplement: Supplementary file [file aging-v11i21-102387-supplementary-material-SD3.pdf]

## SUPPLEMENTARY TABLES

**Supplementary Table 1. Lifespan of *Drosophila melanogaster* fed a KRG-supplemented diet.**

| Sex    | KRG ( $\mu\text{g/mL}$ ) | Mean lifespan (days) | Median lifespan (days) | <i>p</i> -value | $\chi^2$ | N   |
|--------|--------------------------|----------------------|------------------------|-----------------|----------|-----|
| Male   | 0                        | 29.89 $\pm$ 0.70     | 31                     |                 |          | 254 |
|        | 10                       | 33.86 $\pm$ 0.57     | 35                     | 0.031*          | 4.641    | 260 |
|        | 25                       | 34.18 $\pm$ 0.56     | 35                     | 0.004*          | 8.159    | 267 |
|        | 50                       | 31.46 $\pm$ 0.65     | 33                     | 0.365           | 0.822    | 270 |
| Female | 0                        | 22.01 $\pm$ 0.42     | 22                     |                 |          | 303 |
|        | 10                       | 21.51 $\pm$ 0.36     | 22                     | 0.058           | 3.589    | 292 |
|        | 25                       | 23.81 $\pm$ 0.40     | 24                     | 0.018*          | 5.633    | 284 |
|        | 50                       | 19.53 $\pm$ 0.36     | 19                     | <0.0001*        | 24.600   | 291 |

\*Asterisks indicate significant differences compared to control (Log-rank test). Mean lifespan is presented as the average lifespan  $\pm$  standard error. N indicates fly numbers analyzed.

**Supplementary Table 2. Lifespan of *D. melanogaster* fed various yeast extract diets with or without KRG supplementation.**

| Sex    | Yeast conc. (%) | KRG ( $\mu\text{g/mL}$ ) | Mean lifespan (days) | Median lifespan (days) | <i>p</i> -value | $\chi^2$ | N   |
|--------|-----------------|--------------------------|----------------------|------------------------|-----------------|----------|-----|
| Male   | 1               | 0                        | 58.32 $\pm$ 0.91     | 61                     |                 |          | 269 |
|        |                 | 25                       | 57.30 $\pm$ 0.80     | 59                     | 0.012*          | 6.342    | 259 |
|        | 4               | 0                        | 52.26 $\pm$ 0.97     | 53                     |                 |          | 266 |
|        |                 | 25                       | 51.93 $\pm$ 0.88     | 55                     | 0.331           | 0.945    | 266 |
|        | 8               | 0                        | 45.20 $\pm$ 0.96     | 47                     |                 |          | 273 |
|        |                 | 25                       | 48.12 $\pm$ 0.89     | 49                     | 0.032*          | 4.579    | 270 |
| Female | 1               | 0                        | 46.99 $\pm$ 0.98     | 49                     |                 |          | 283 |
|        |                 | 25                       | 47.58 $\pm$ 0.85     | 49                     | 0.466           | 0.531    | 278 |
|        | 4               | 0                        | 38.20 $\pm$ 0.87     | 41                     |                 |          | 271 |
|        |                 | 25                       | 41.85 $\pm$ 0.82     | 43                     | 0.013*          | 6.164    | 274 |
|        | 8               | 0                        | 27.77 $\pm$ 0.72     | 27                     |                 |          | 296 |
|        |                 | 25                       | 29.55 $\pm$ 0.81     | 31                     | 0.012*          | 6.275    | 273 |

\*Asterisks indicate significant differences compared to control (Log-rank test). Mean lifespan is presented as the average lifespan  $\pm$  standard error. N indicates fly numbers analyzed.

**Supplementary Table 3. Effect of KRG diet supplement on the lifespan of *dSir2* and *chico* mutant fruit flies.**

| Sex    | Strain                         | KRG (µg/mL) | Mean lifespan (days) | Median lifespan (days) | p-value  | $\chi^2$ | N   |
|--------|--------------------------------|-------------|----------------------|------------------------|----------|----------|-----|
| Male   | <i>w<sup>1118</sup></i>        | 0           | 76.47 ± 1.01         | 80                     | <0.0001* | 18.417   | 253 |
|        |                                | 25          | 83.11 ± 0.80         | 86                     |          |          | 257 |
|        | <i>dSir2<sup>2A-7-11</sup></i> | 0           | 47.90 ± 0.75         | 48                     | 0.280    | 1.169    | 268 |
|        |                                | 25          | 45.96 ± 0.83         | 46                     |          |          | 272 |
|        | <i>chico<sup>1/+</sup></i>     | 0           | 88.06 ± 0.83         | 90                     | 0.257    | 1.287    | 236 |
|        |                                | 25          | 86.67 ± 0.80         | 89                     |          |          | 262 |
| Female | <i>w<sup>1118</sup></i>        | 0           | 67.62 ± 1.11         | 70                     | <0.0001* | 28.885   | 291 |
|        |                                | 25          | 76.55 ± 0.98         | 82                     |          |          | 278 |
|        | <i>dSir2<sup>2A-7-11</sup></i> | 0           | 48.89 ± 0.93         | 53                     | 0.011*   | 6.387    | 266 |
|        |                                | 25          | 45.82 ± 0.91         | 48                     |          |          | 281 |
|        | <i>chico<sup>1/+</sup></i>     | 0           | 99.15 ± 0.77         | 101                    | 0.003*   | 9.096    | 248 |
|        |                                | 25          | 92.94 ± 0.97         | 95                     |          |          | 249 |

\* Asterisks indicate significant differences compared to control (Log-rank test). Mean lifespan is presented as the average lifespan ± standard error. N indicates fly numbers analyzed.

**Supplementary Table 4. Effect of KRG diet supplement on the lifespan of *dFOXO* mutant fruit flies.**

| Sex                         | Strain                     | KRG (µg/mL)  | Mean lifespan (days) | Median lifespan (days) | p-value  | $\chi^2$ | N   |
|-----------------------------|----------------------------|--------------|----------------------|------------------------|----------|----------|-----|
| Male                        | <i>yw</i>                  | 0            | 55.07 ± 0.56         | 55                     | <0.0001* | 13.453   | 287 |
|                             |                            | 25           | 56.60 ± 0.69         | 57                     |          |          | 249 |
|                             | <i>foxo<sup>21/+</sup></i> | 0            | 59.14 ± 0.69         | 60                     | 0.003*   | 8.784    | 247 |
|                             |                            | 25           | 61.12 ± 0.77         | 64                     |          |          | 262 |
|                             | <i>foxo<sup>22/+</sup></i> | 0            | 67.04 ± 0.60         | 70                     | 0.245    | 1.351    | 286 |
|                             |                            | 25           | 64.94 ± 0.75         | 67                     |          |          | 251 |
| <i>foxo<sup>21/23</sup></i> | 0                          | 54.68 ± 0.92 | 57                   | 0.772                  | 0.084    | 280      |     |
|                             | 25                         | 55.07 ± 0.88 | 57                   |                        |          | 294      |     |
| Female                      | <i>yw</i>                  | 0            | 52.30 ± 0.77         | 55                     | 0.025*   | 5.012    | 295 |
|                             |                            | 25           | 53.61 ± 0.85         | 57                     |          |          | 251 |
|                             | <i>foxo<sup>21/+</sup></i> | 0            | 54.28 ± 0.67         | 57                     | 0.092    | 2.836    | 276 |
|                             |                            | 25           | 54.93 ± 0.66         | 55                     |          |          | 270 |
|                             | <i>foxo<sup>22/+</sup></i> | 0            | 62.57 ± 0.72         | 64                     | 0.221    | 1.499    | 273 |
|                             |                            | 25           | 64.18 ± 0.67         | 64                     |          |          | 250 |
| <i>foxo<sup>21/23</sup></i> | 0                          | 52.99 ± 0.84 | 55                   | 0.646                  | 0.210    | 227      |     |
|                             | 25                         | 52.26 ± 0.86 | 55                   |                        |          | 218      |     |

\* Asterisks indicate significant differences compared to control. Mean lifespan is presented as the average lifespan ± standard error. N indicates fly numbers analyzed.
